# Supplementary material
Source: Springer Nature journal article supplement (https://www.springermedizin.de/resource/supplementary/12889_2006_649_MOESM1_ESM.pdf/9502220)
Supplement: MOESM1 [file 9502220]

1191 close contacts

Lost = 131

N = 1060

TST  $\geq$  5 mm  
N = 488

TST  $\leq$  4 mm  
N = 572

Lost = 117

Second TST (7-14 days after the first one)

N = 455

Absence of boosting  
N = 427

Presence of boosting  
N = 28
